# Supplementary material
Source: Springer Nature journal article supplement (https://www.springermedizin.de/resource/supplementary/13256_2011_2124_MOESM4_ESM.pdf/9649076)

Left Eye

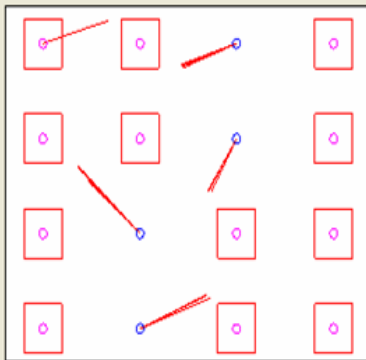

Right Eye

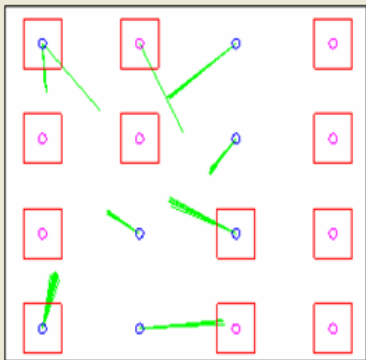

Supplement: MOESM4 [file 9649076]
